# Supplementary material
Source: PubMed Central journal article supplement (PMC6566847)
Supplement: NIHMS1018417-supplement-SI.pdf [file NIHMS1018417-supplement-SI.pdf]

# Interrogation of eukaryotic stop codon readthrough signals by *in vitro* RNA selection

AUTHORS: Andrew V. Anzalone, Sakellarios Zairis, Annie J. Lin, Raul Rabadan & Virginia W. Cornish

## Supplementary Materials Contents

- Figure S1.** Mock *in vitro* selection experiments
  - Figure S2.** Distribution of post-selection sequencing reads
  - Figure S3.** Enrichment of FLAG-like peptide encoding sequences
  - Figure S4.** Codon frequency distributions in post-selection enriched sequences
  - Figure S5.** Sequence enrichment normalized to library prevalence
  - Figure S6.** E-TMV motif sequence pairings
  - Figure S7.** Extended primary sequence motifs
  - Figure S8.** Downstream primary sequence enrichment
  - Figure S9.** Predicted secondary structures for top ranked library members
  - Figure S10.** Classification performance on held out data
  - Figure S11.** Decision trees as weak rules
  - Figure S12.** Validation of CMV-dualFP vector for readthrough assays in HEK293T cells
  - Figure S13.** Full western blot of VDR readthrough in HEK293T cells
  - Figure S14.** Complementary sequences in 18S rRNA and mechanistic interpretations
- 
- Table S1.** DNA sequences of *in vitro* selection constructs
  - Table S2.** Oligonucleotide used in this study
  - Table S3.** Plasmids used in this study
  - Table S4.** Sequences of synthetic readthrough constructs
  - Table S5.** Sequences of human 3'-UTR constructs
  - Table S6.** Dual-FP reporter sequences

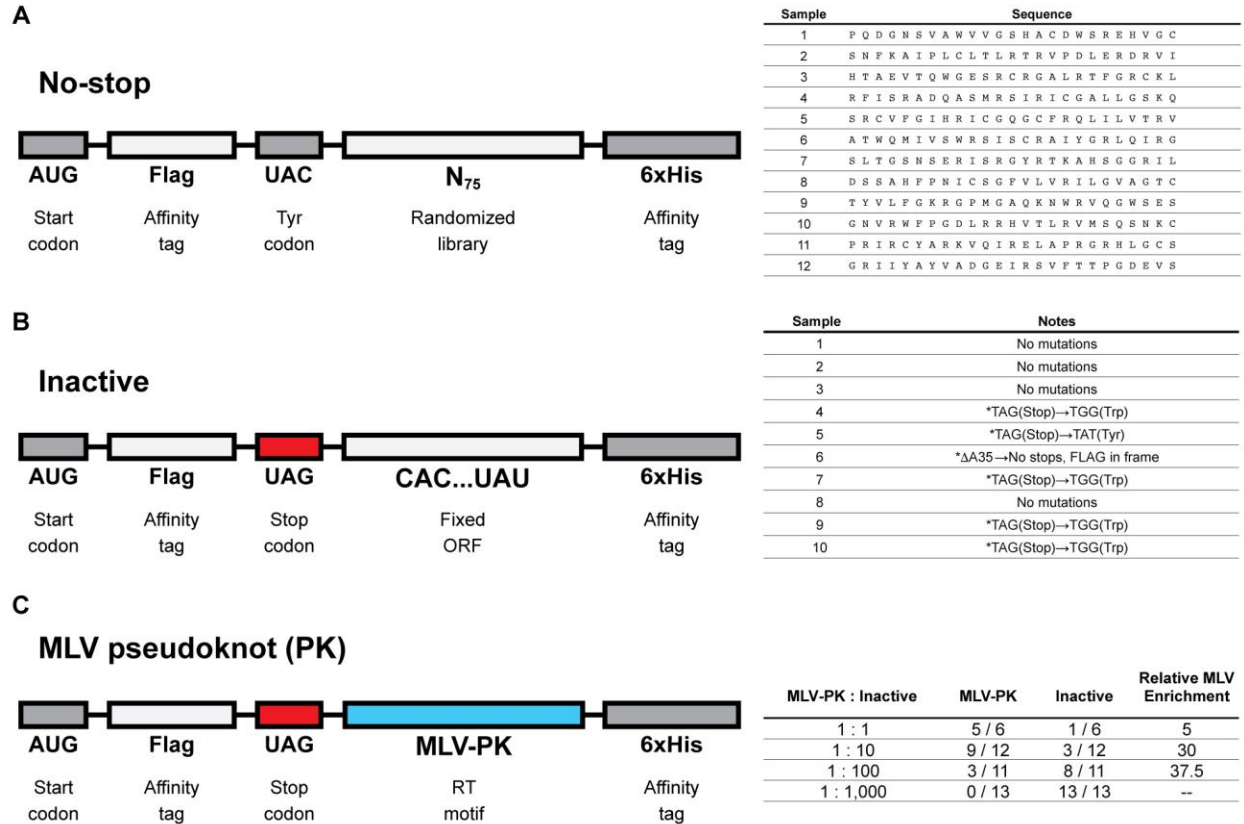

**Figure S1.** Mock *in vitro* selection experiments. A single mRNA-display selection cycle was performed using the control constructs shown. Selection products were cloned, then individual colonies were sampled and analyzed by Sanger sequencing. (A) A control library containing 75 randomized nucleotides, lacking a deliberately installed stop codon. Assuming equal nucleotide probability weightings, each library member has a 30% probability of containing zero stop codons. All twelve post-selection library members that were sequenced were found to encode open reading frames devoid of stop codons (amino acid sequences shown). The p-value of this result is  $5 \times 10^{-7}$ . (B) A single sequence control construct with one deliberately installed stop codon. Post-selection products showed enrichment for stop codon mutations or mutations that placed the UAG out of frame. (C) A single sequence control construct with one deliberately installed stop codon and the readthrough signal from the Murine Leukemia Virus positioned appropriately downstream. When translating this mRNA display template in a single reaction alongside the inactive construct shown in (B), post-selection enrichment for the readthrough signal was observed as shown in the adjacent table.

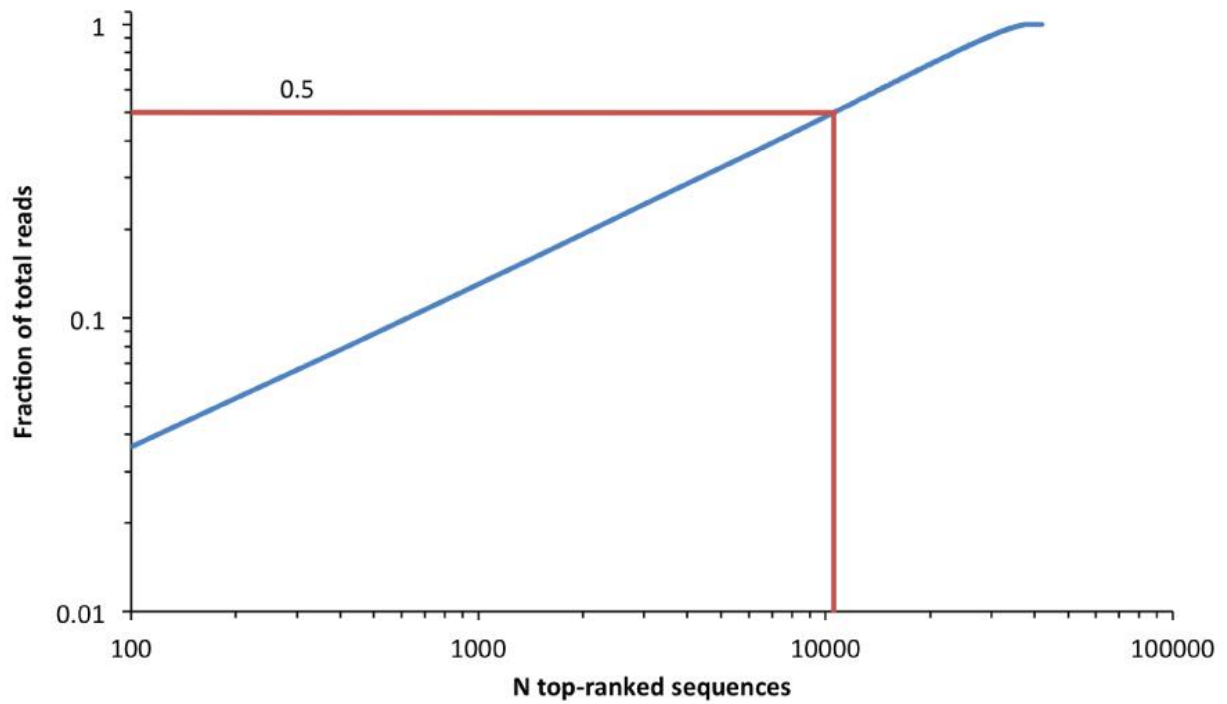

**Figure S2.** Distribution of post-selection sequencing reads. Plotted is the cumulative fraction of total reads contributed by the top N-ranked sequences ordered by abundance. The top 100 unique sequences account for roughly 3.5% of total reads. Just over 10,000 sequences account for 50% of total sequencing reads.

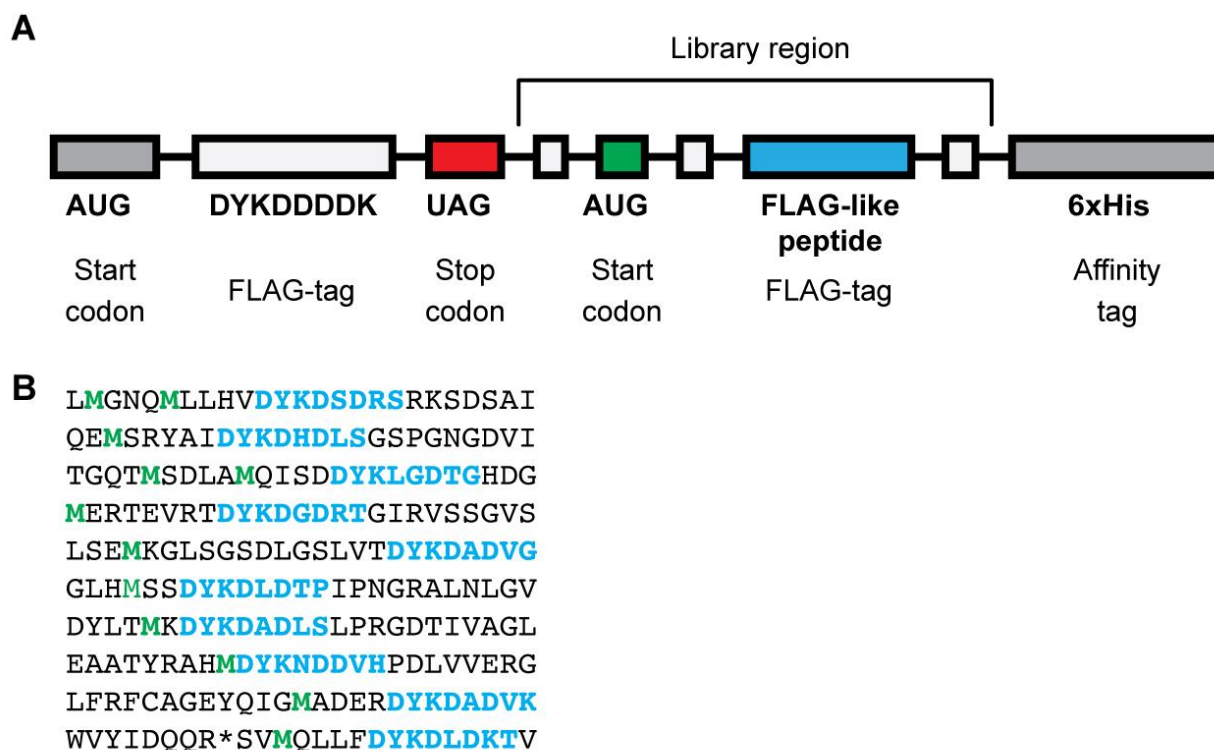

**Figure S3.** Enrichment of FLAG-like peptide encoding sequences. (A) Sequences that encode AUG start codons and downstream FLAG-like peptide epitopes were enriched by *in vitro* selection. Presumably, translation initiation was possible downstream of the UAG stop codons, therefore circumventing the requirement for stop codon readthrough. These sequences demonstrated no readthrough activity in cellular assays. (B) Examples of sequences enriched by this mechanism. Methionine start codons are shown in green, FLAG-like peptide epitopes are shown in blue, and the asterisk denotes a stop codon. Sequences containing putative FLAG epitopes were removed from the readthrough dataset and compiled into a ‘decoy’ sequence set.

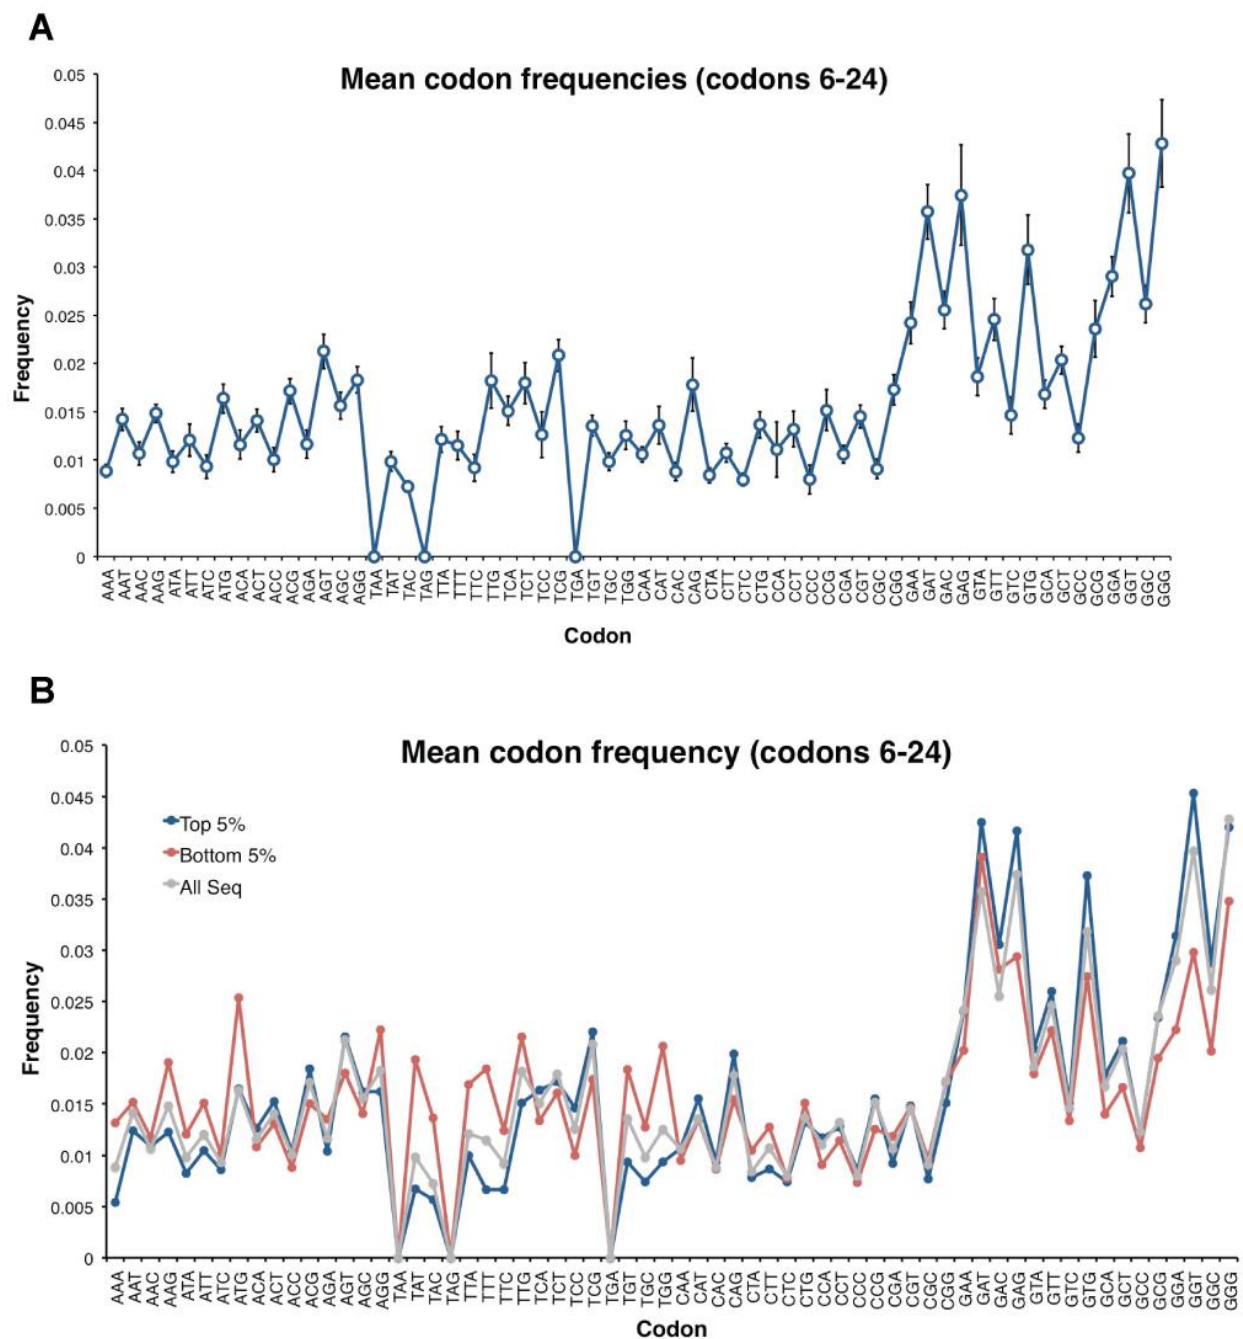

**Figure S4.** Codon frequency distributions in post-selection enriched sequences. Downstream library codon frequencies were assessed to determine potential codon usage bias, and for normalization of relative enrichments. (A) Mean triplet sequence frequency for codon positions 6 through 24 (nucleotides 16-72) within the library. Error bars represent the standard deviation. (B) Same plot as in (A), with the addition of codon frequency distributions for the sets of sequences ranked in the top 5% and bottom 5% by abundance.

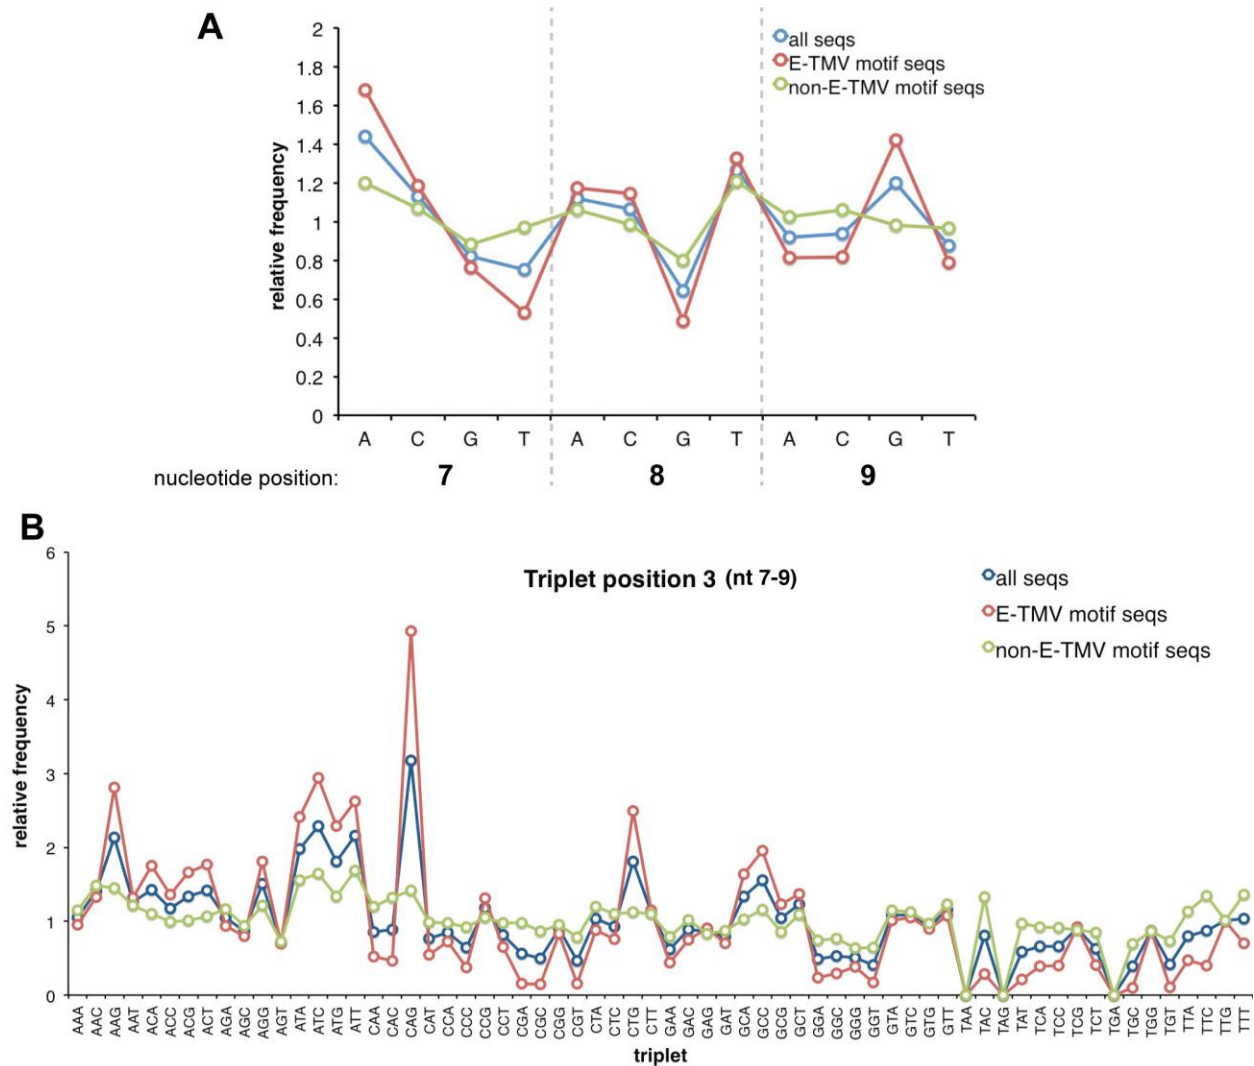

**Figure S5.** Sequence enrichment normalized to library prevalence. (A) Nucleotide frequencies in positions 7 through 9 were normalized to downstream nucleotide frequencies in the corresponding reading frame (i.e. position 7 is normalized to the mean of positions 16, 19, 22, ..., 70). Frequency distributions are plotted for all readthrough sequences, those that fall into the E-TMV motif set, and those that do not fall in the E-TMV motif set. (B) Triplet frequencies for triplet position 3 (nucleotides 7-9) were normalized to downstream codon frequencies (see Supp. Fig. 4). Frequency distributions are plotted for the full set of readthrough sequences, the E-TMV motif set, and the non-E-TMV motif set.

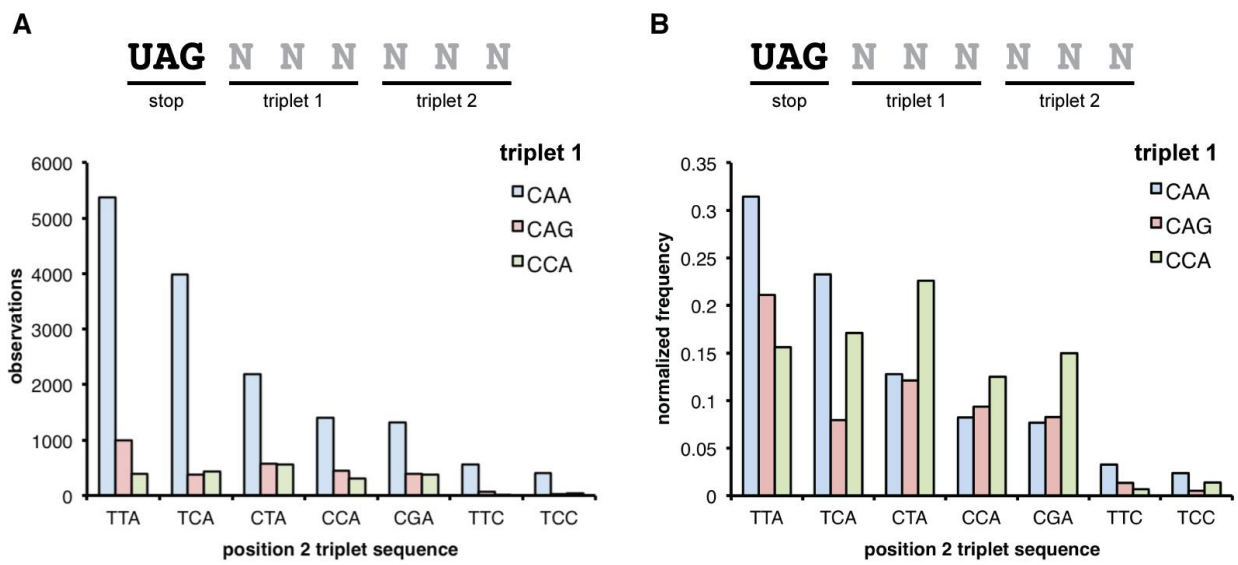

**Figure S6.** E-TMV motif sequence pairings. The E-TMV motif comprises a set of hexanucleotide sequences that begin with the triplets CAA, CAG, and CAA. These are followed by a subset of triplets including TTA, TCA, CTA, CCA, and CGA. When CAA occupies the first triplet position, TTC and TCC are also frequently observed. (A) Unique sequence observations containing the E-TMV motif triplet pairings are plotted as indicated. (B) E-TMV motif triplet pairings normalized to the total number of CAA, CAG, or CAA containing sequences.

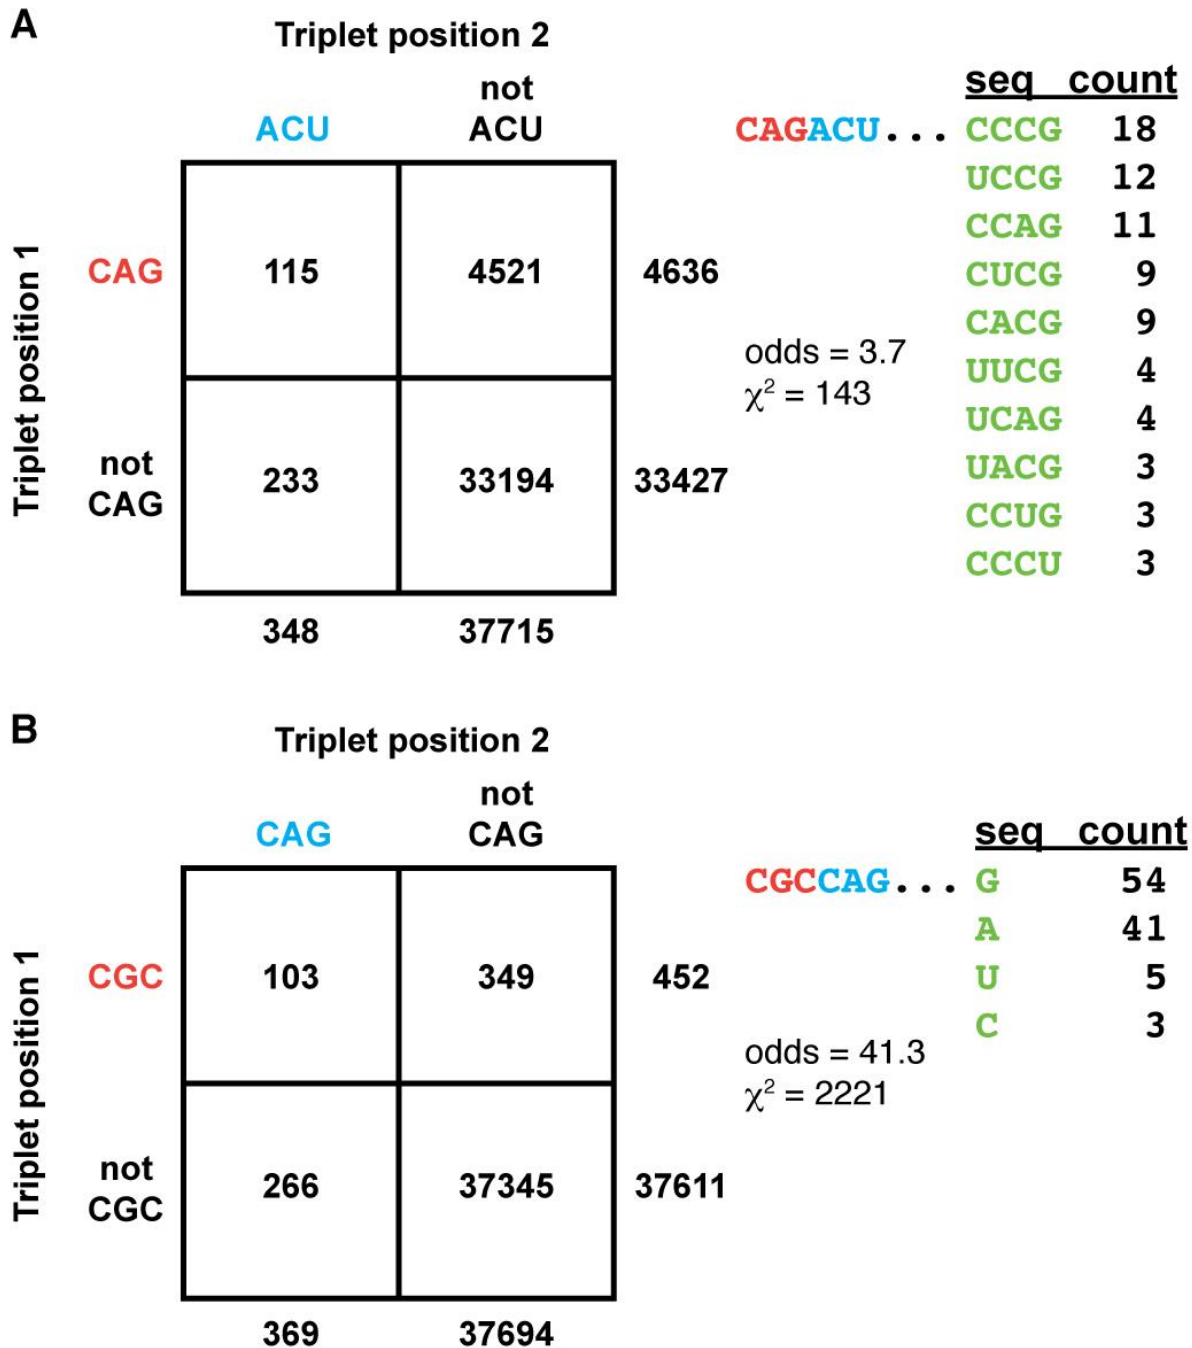

**Figure S7.** Extended primary sequence motifs. (A) The CAG-ACU pairing was discovered by Fisher's exact test. The contingency table for this association is shown with the odds ratio (OR) and chi-squared ( $\chi^2$ ) statistic. The table to the right shows the ranked abundances of tetranucleotide sequences following CAGACU. (B) The CGC-CAG pairing. The contingency table for this association is shown with the odds ratio (OR) and chi-squared ( $\chi^2$ ) statistic. The table to the right shows the ranked abundances of nucleotides following CGCCAG, forming a consensus sequence of CGCCAGR



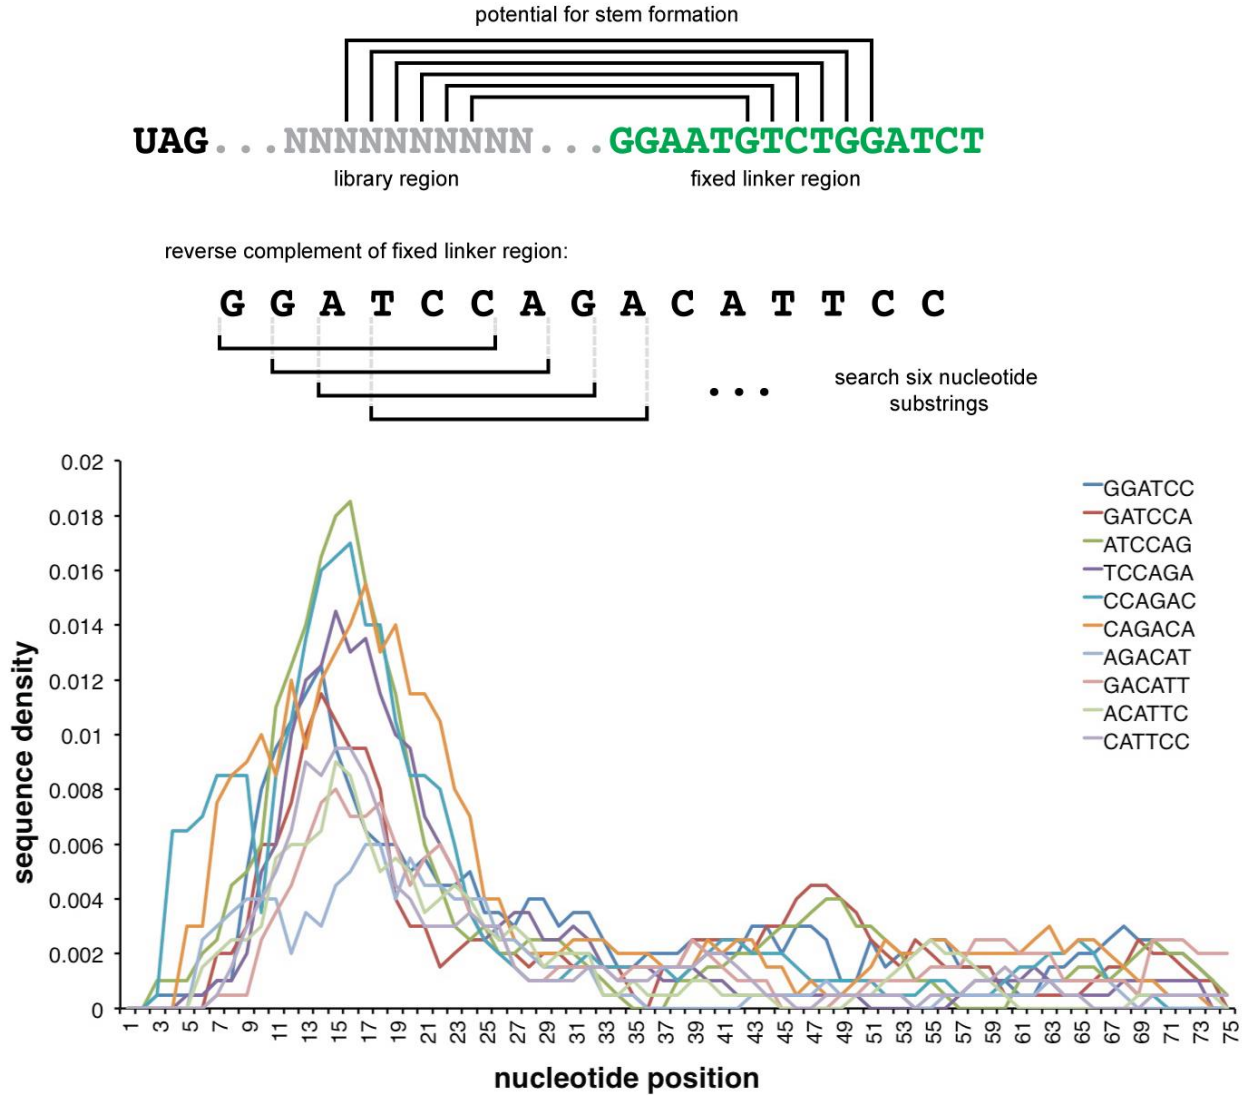

**Figure S8.** Downstream primary sequence enrichment. Library members that contain sequence strings that are complementary to a downstream fixed linker sequence have the capacity to form RNA stem structures. This was evaluated by mapping the density of 6-nucleotide windows of complementary hexanucleotide strings over the length of the 75-nucleotide library region. Density of individual hexanucleotide strings is shown. See **Fig. 3a** for averaged substring density.

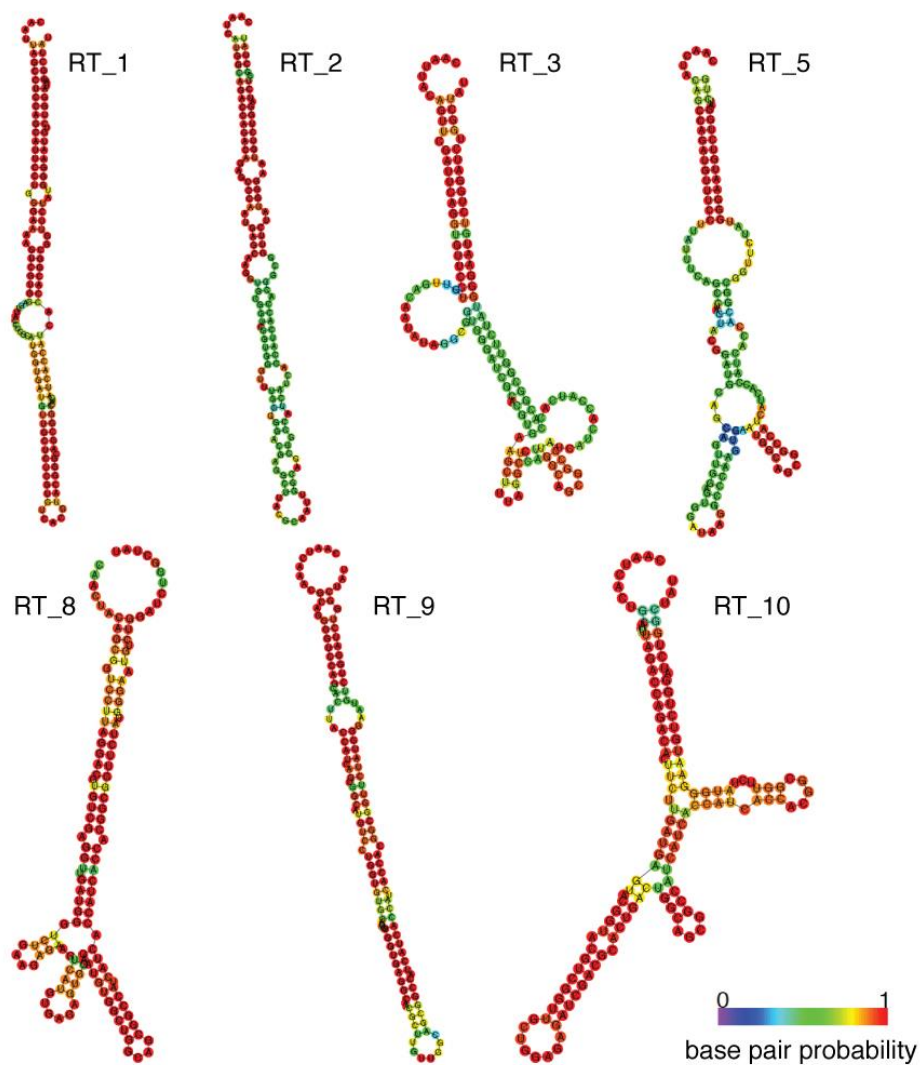

**Figure S9.** Predicted secondary structures for top ranked library members. Extensive secondary structure predictions are shown for 7 out of the top 10 top ranked library members (rank indicated by the numbering RT\_N). Base coloring represents base pairing probability, as indicated by the legend.

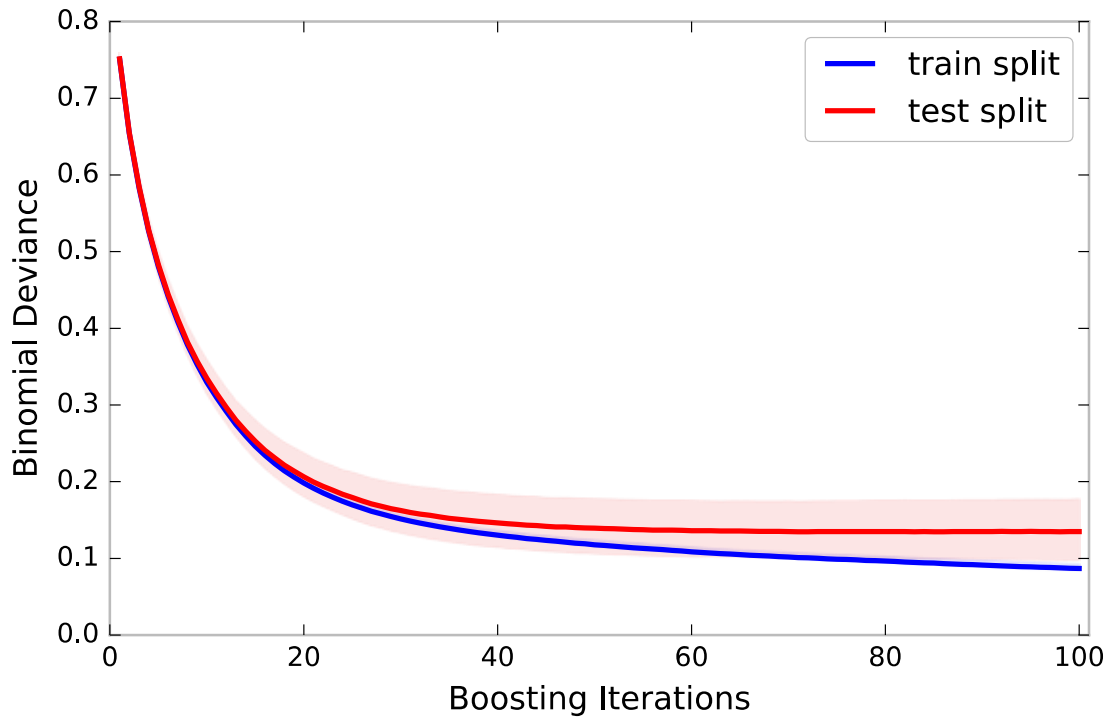

**Figure S10.** Classification performance on held out data. No evidence of overfitting, captured by test set loss, is observed over the 100 rounds of boosting under 10-fold cross validation.

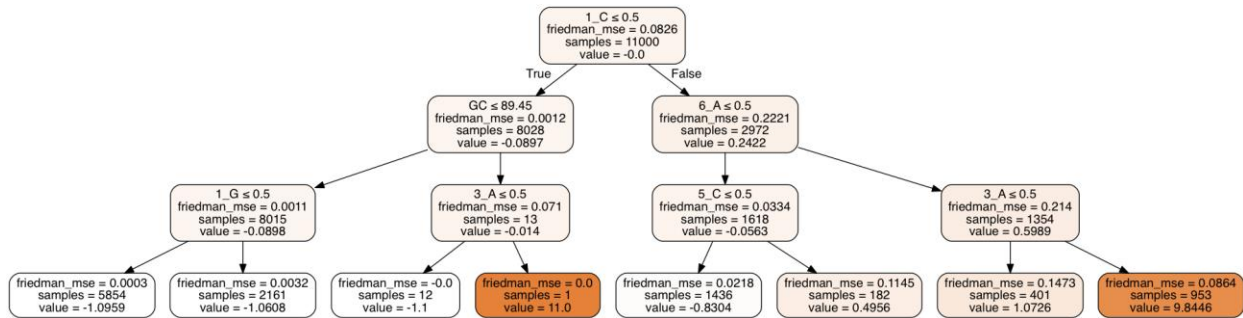

**Figure S11.** Decision trees as weak rules. The first weak rule incorporated into the boosted model discriminates, at the top level, on having cytosine at the 1<sup>st</sup> position. Depending on the status, having GC content greater than 89.45% or having guanine at the 6<sup>th</sup> position is the next discriminating feature, and so forth. An additive model of 100 such decision trees (weak rules) comprise the overall classifier.

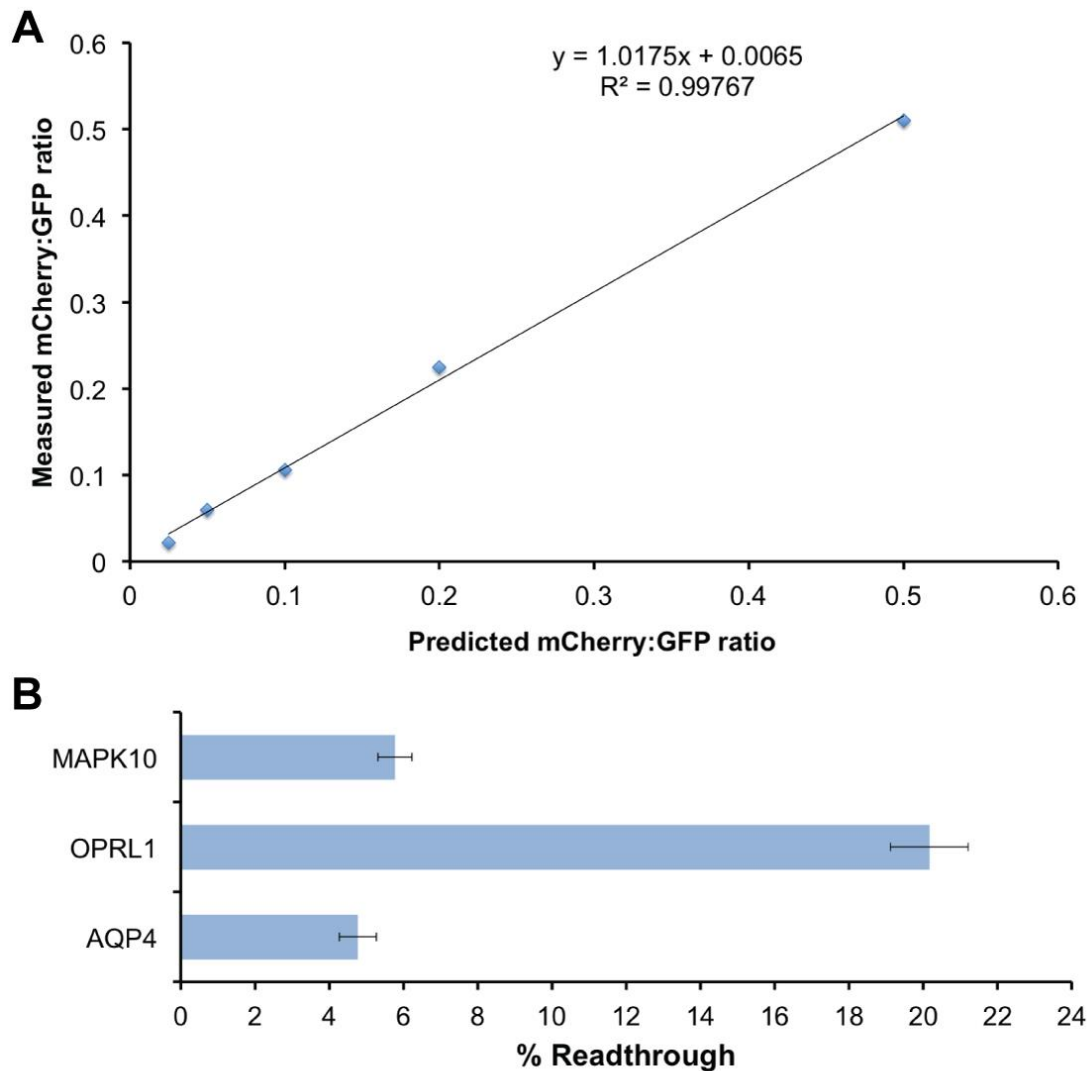

**Figure S12.** Validation of CMV-dualFP vector for readthrough assays in HEK293T cells. (A) A full-length EGFP-mCherry fusion construct was co-transfected with a construct containing a stop codon separating the EGFP and mCherry open reading frames (without a readthrough element). These two plasmids were transfected at different ratios, EGFP and mCherry fluorescence recorded, and the fluorescence ratio normalized to the single EGFP-mCherry plasmid transfection (set to 1). (B) Measurement of readthrough activity for three previously reported human 3'-UTRs in the dual-FP reporter.

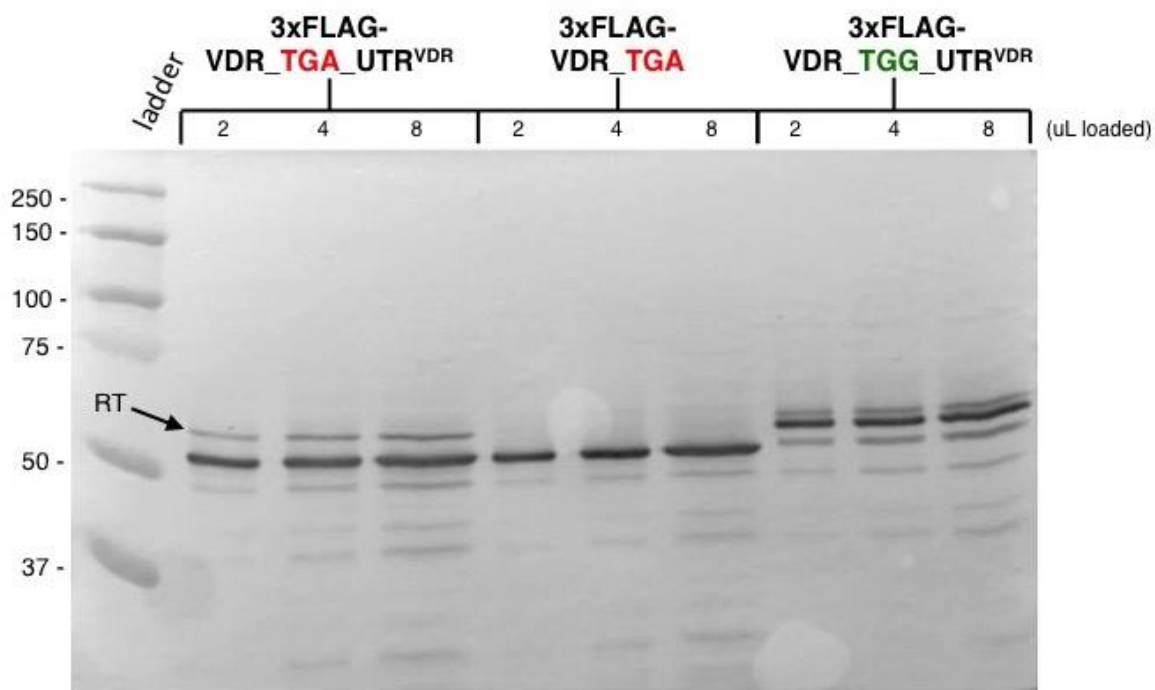

VDR = 51 kDa  
 VDR RT product = 58 kDa

Anti-FLAG M2 HRP

**Figure S13.** Full western blot of VDR readthrough in HEK293T cells. 293T cells were transfected with VDR expression plasmids as described in the Materials and Methods section. Lane 1: ladder. Lanes 2-4, 3xFLAG-tag VDR encoding its cognate UGA stop codon and the first 201 nucleotides of its 3'-UTR, with 2, 4, or 8 uL of lysate loaded. Lanes 5-7, 3xFLAG-tag VDR encoding its cognate UGA stop codon and no additional VDR 3'-UTR sequence, with 2, 4, or 8 uL of lysate loaded. Lanes 8-10, 3xFLAG-tag VDR encoding a UGG tryptophan codon in place of the cognate UGA stop codon and the first 201 nucleotides of its 3'-UTR, with 2, 4, or 8 uL of lysate loaded.

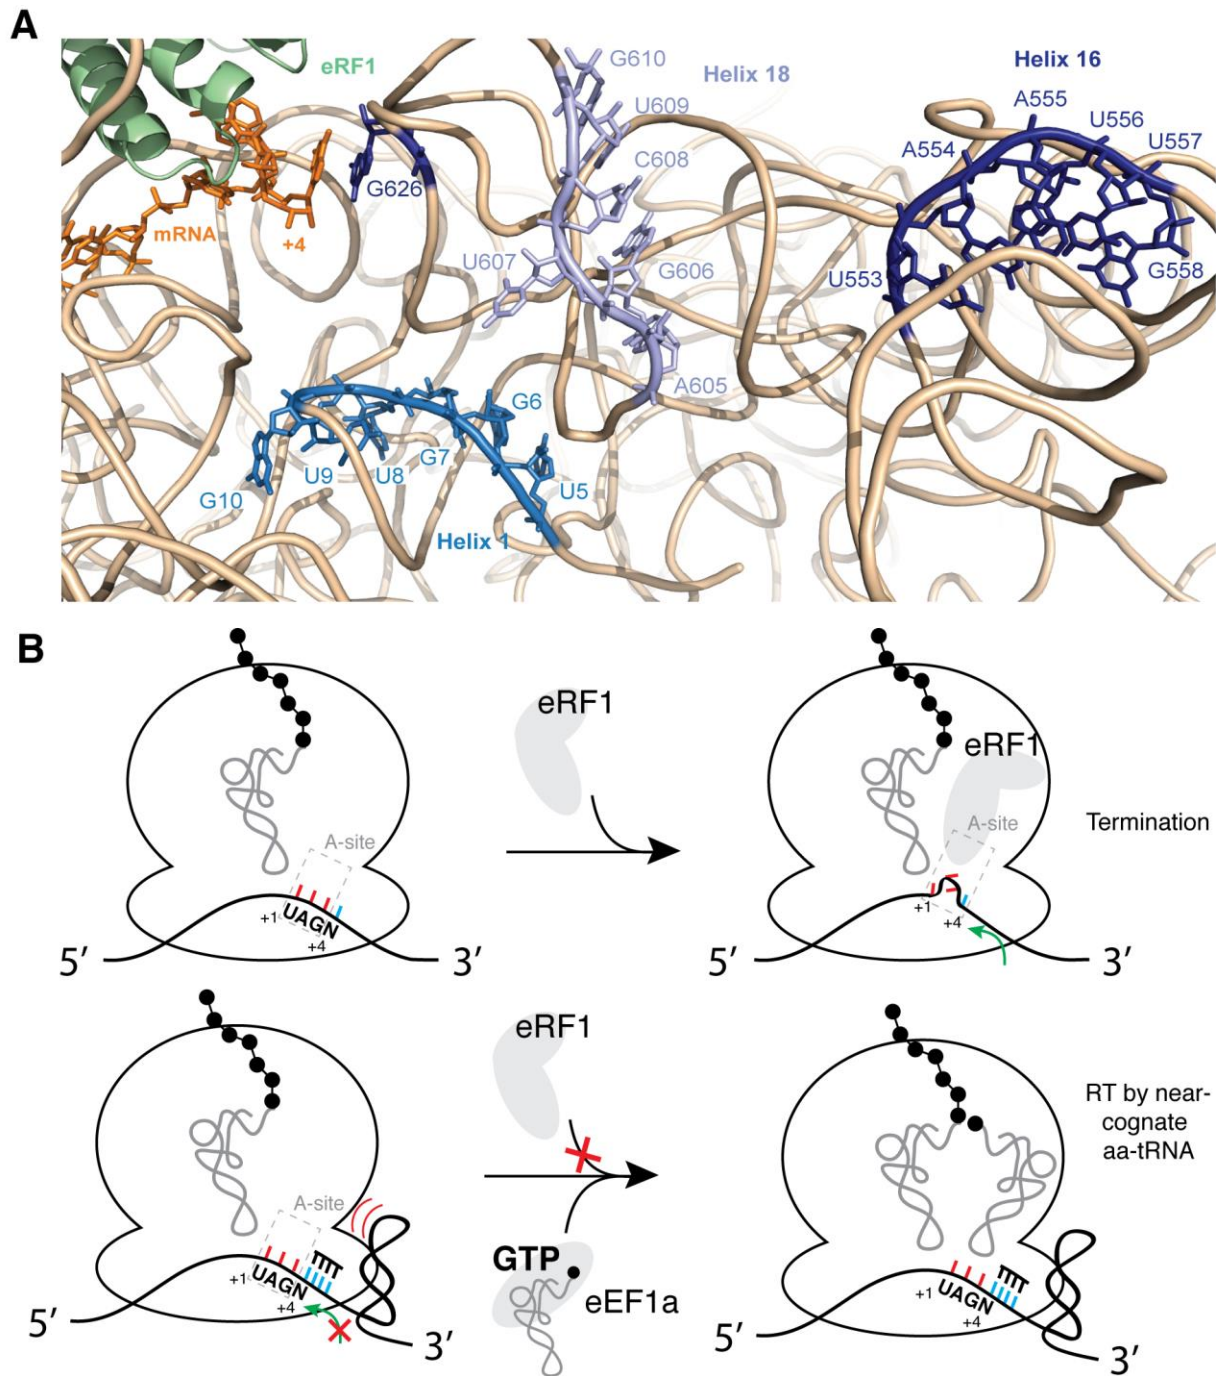

**Figure S14.** Complementary sequences in 18S rRNA and mechanistic interpretations. (A) Cryo-EM structure of eRF1 in active recognition of a stop codon, generated from pdb 3jag. eRF1 (green) is shown binding to the stop codon within the mRNA (orange). Two stretches of sequence in helix 1 (marine) and helix 18 (steel blue), located in proximity to the mRNA tunnel, are complementary to primary sequence readthrough motifs CAAYYA and CAGACU. Helix 16 also contains a stretch of nucleotides (dark blue) complementary to the TMV motif, but is distant from the decoding center. (B) Mechanistic interpretation of readthrough by primary sequence and secondary structure motifs. Normal stop codon recognition by eRF1 induces a contraction of

the mRNA within the A-site. This motion can be inhibited by mRNA sequences that interact, perhaps by direct base pairing, with the ribosomal small subunit. Furthermore, RNA structural elements situated at the entryway of the mRNA tunnel could inhibit the requisite mRNA motions. This inhibition of translation termination provides time for decoding stop codons with near-cognate aminoacyl-tRNAs.







**Table S3.** Plasmids used in this study.

| Plasmid                  | Construct details                 | Comments                            |
|--------------------------|-----------------------------------|-------------------------------------|
| pCR-NegRT                | T7-TAG-InactiveRT                 | Kan <sup>R</sup> , Amp <sup>R</sup> |
| pCR-MLV-PK               | T7-TAG-MLV-PK                     | Kan <sup>R</sup> , Amp <sup>R</sup> |
| p425-dualFP <sup>§</sup> | p425-pTHD3-yEGFP-mCherry          | Leu2, 2-micron, Amp <sup>R</sup>    |
| p425-UAG-RT1             | p425-pTHD3-yEGFP-UAG-RT1-mCherry  | Leu2, 2-micron, Amp <sup>R</sup>    |
| p425-UAG-RT2             | p425-pTHD3-yEGFP-UAG-RT2-mCherry  | Leu2, 2-micron, Amp <sup>R</sup>    |
| p425-UAG-RT3             | p425-pTHD3-yEGFP-UAG-RT3-mCherry  | Leu2, 2-micron, Amp <sup>R</sup>    |
| p425-UAG-RT4             | p425-pTHD3-yEGFP-UAG-RT4-mCherry  | Leu2, 2-micron, Amp <sup>R</sup>    |
| p425-UAG-RT5             | p425-pTHD3-yEGFP-UAG-RT5-mCherry  | Leu2, 2-micron, Amp <sup>R</sup>    |
| p425-UAG-RT6             | p425-pTHD3-yEGFP-UAG-RT6-mCherry  | Leu2, 2-micron, Amp <sup>R</sup>    |
| p425-UAG-RT7             | p425-pTHD3-yEGFP-UAG-RT7-mCherry  | Leu2, 2-micron, Amp <sup>R</sup>    |
| p425-UAG-RT8             | p425-pTHD3-yEGFP-UAG-RT8-mCherry  | Leu2, 2-micron, Amp <sup>R</sup>    |
| p425-UAG-RT9             | p425-pTHD3-yEGFP-UAG-RT9-mCherry  | Leu2, 2-micron, Amp <sup>R</sup>    |
| p425-UAG-RT10            | p425-pTHD3-yEGFP-UAG-RT10-mCherry | Leu2, 2-micron, Amp <sup>R</sup>    |
| p425-UAG-RT11            | p425-pTHD3-yEGFP-UAG-RT11-mCherry | Leu2, 2-micron, Amp <sup>R</sup>    |
| p425-UAG-RT12            | p425-pTHD3-yEGFP-UAG-RT12-mCherry | Leu2, 2-micron, Amp <sup>R</sup>    |
| p425-UAG-RT13            | p425-pTHD3-yEGFP-UAG-RT13-mCherry | Leu2, 2-micron, Amp <sup>R</sup>    |
| p425-UAG-RT14            | p425-pTHD3-yEGFP-UAG-RT14-mCherry | Leu2, 2-micron, Amp <sup>R</sup>    |
| p425-UAG-RT15            | p425-pTHD3-yEGFP-UAG-RT15-mCherry | Leu2, 2-micron, Amp <sup>R</sup>    |
| p425-UAG-RT16            | p425-pTHD3-yEGFP-UAG-RT16-mCherry | Leu2, 2-micron, Amp <sup>R</sup>    |
| p425-UAG-RT17            | p425-pTHD3-yEGFP-UAG-RT17-mCherry | Leu2, 2-micron, Amp <sup>R</sup>    |
| p425-UAG-RT18            | p425-pTHD3-yEGFP-UAG-RT18-mCherry | Leu2, 2-micron, Amp <sup>R</sup>    |
| p425-UAG-RT19            | p425-pTHD3-yEGFP-UAG-RT19-mCherry | Leu2, 2-micron, Amp <sup>R</sup>    |
| p425-UAG-RT20            | p425-pTHD3-yEGFP-UAG-RT20-mCherry | Leu2, 2-micron, Amp <sup>R</sup>    |
| p425-UAG-RT21            | p425-pTHD3-yEGFP-UAG-RT21-mCherry | Leu2, 2-micron, Amp <sup>R</sup>    |
| p425-UAG-RT22            | p425-pTHD3-yEGFP-UAG-RT22-mCherry | Leu2, 2-micron, Amp <sup>R</sup>    |
| p425-UAG-RT23            | p425-pTHD3-yEGFP-UAG-RT23-mCherry | Leu2, 2-micron, Amp <sup>R</sup>    |
| p425-UAG-RT24            | p425-pTHD3-yEGFP-UAG-RT24-mCherry | Leu2, 2-micron, Amp <sup>R</sup>    |
| p425-UAG-RT25            | p425-pTHD3-yEGFP-UAG-RT25-mCherry | Leu2, 2-micron, Amp <sup>R</sup>    |
| p425-UAA-RT1             | p425-pTHD3-yEGFP-UAA-RT1-mCherry  | Leu2, 2-micron, Amp <sup>R</sup>    |
| p425-UAA-RT2             | p425-pTHD3-yEGFP-UAA-RT2-mCherry  | Leu2, 2-micron, Amp <sup>R</sup>    |
| p425-UAA-RT8             | p425-pTHD3-yEGFP-UAA-RT8-mCherry  | Leu2, 2-micron, Amp <sup>R</sup>    |
| p425-UAA-RT9             | p425-pTHD3-yEGFP-UAA-RT9-mCherry  | Leu2, 2-micron, Amp <sup>R</sup>    |
| p425-UAA-RT10            | p425-pTHD3-yEGFP-UAA-RT10-mCherry | Leu2, 2-micron, Amp <sup>R</sup>    |
| p425-UAA-RT11            | p425-pTHD3-yEGFP-UAA-RT11-mCherry | Leu2, 2-micron, Amp <sup>R</sup>    |

|                          |                                   |                                     |
|--------------------------|-----------------------------------|-------------------------------------|
| p425-UGA-RT1             | p425-pTHD3-yEGFP-UGA-RT1-mCherry  | Leu2, 2-micron, Amp <sup>R</sup>    |
| p425-UGA-RT2             | p425-pTHD3-yEGFP-UGA-RT2-mCherry  | Leu2, 2-micron, Amp <sup>R</sup>    |
| p425-UGA-RT8             | p425-pTHD3-yEGFP-UGA-RT8-mCherry  | Leu2, 2-micron, Amp <sup>R</sup>    |
| p425-UGA-RT9             | p425-pTHD3-yEGFP-UGA-RT9-mCherry  | Leu2, 2-micron, Amp <sup>R</sup>    |
| p425-UGA-RT10            | p425-pTHD3-yEGFP-UGA-RT10-mCherry | Leu2, 2-micron, Amp <sup>R</sup>    |
| p425-UGA-RT11            | p425-pTHD3-yEGFP-UGA-RT11-mCherry | Leu2, 2-micron, Amp <sup>R</sup>    |
| pCMV-dualFP <sup>‡</sup> | pCMV-EGFP-mCherry                 | via Addgene 20972; Amp <sup>R</sup> |
| pCMV-RT1                 | pCMV-EGFP-RT1-mCherry             | Amp <sup>R</sup>                    |
| pCMV-RT3                 | pCMV-EGFP-RT3-mCherry             | Amp <sup>R</sup>                    |
| pCMV-RT9                 | pCMV-EGFP-RT9-mCherry             | Amp <sup>R</sup>                    |
| pCMV-RT18                | pCMV-EGFP-RT18-mCherry            | Amp <sup>R</sup>                    |
| pCMV-AQP4                | pCMV-EGFP-AQP4-mCherry            | Amp <sup>R</sup>                    |
| pCMV-MAPK10              | pCMV-EGFP-MAPK10-mCherry          | Amp <sup>R</sup>                    |
| pCMV-OPRL1               | pCMV-EGFP-OPRL1-mCherry           | Amp <sup>R</sup>                    |
| pCMV-PCSK9               | pCMV-EGFP-PCSK9-mCherry           | Amp <sup>R</sup>                    |
| pCMV-IL18                | pCMV-EGFP-IL18-mCherry            | Amp <sup>R</sup>                    |
| pCMV-PTDSS2              | pCMV-EGFP-PTDSS2-mCherry          | Amp <sup>R</sup>                    |
| pCMV-VGLL2               | pCMV-EGFP-VGLL2-mCherry           | Amp <sup>R</sup>                    |
| pCMV-ERVV2               | pCMV-EGFP-ERVV2-mCherry           | Amp <sup>R</sup>                    |
| pCMV-SYT12               | pCMV-EGFP-SYT12-mCherry           | Amp <sup>R</sup>                    |
| pCMV-RXFP2               | pCMV-EGFP-RXFP2-mCherry           | Amp <sup>R</sup>                    |
| pCMV-CCNE1               | pCMV-EGFP-CCNE1-mCherry           | Amp <sup>R</sup>                    |
| pCMV-PVRL3               | pCMV-EGFP-PVRL3-mCherry           | Amp <sup>R</sup>                    |
| pCMV-VDR                 | pCMV-EGFP-VDR -mCherry            | Amp <sup>R</sup>                    |
| pCMV-trACP2              | pCMV-EGFP-trACP2-mCherry          | Amp <sup>R</sup>                    |
| pCMV-ACP2                | pCMV-EGFP-ACP2-mCherry            | Amp <sup>R</sup>                    |
| pCMV-EDN1                | pCMV-EGFP-EDN1-mCherry            | Amp <sup>R</sup>                    |
| pCMV-CDKN2B              | pCMV-EGFP-CDKN2B-mCherry          | Amp <sup>R</sup>                    |
| pCMV-KCNF1               | pCMV-EGFP-KCNF1-mCherry           | Amp <sup>R</sup>                    |
| pCMV-MYNN                | pCMV-EGFP-MYNN-mCherry            | Amp <sup>R</sup>                    |
| pCMV-NKX2-4              | pCMV-EGFP-NKX2-4-mCherry          | Amp <sup>R</sup>                    |
| pCMV-KIF3C               | pCMV-EGFP-KIF3C-mCherry           | Amp <sup>R</sup>                    |
| pCMV-PRR20A              | pCMV-EGFP-PRR20A-mCherry          | Amp <sup>R</sup>                    |
| pCMV-FGD5                | pCMV-EGFP-FGD5-mCherry            | Amp <sup>R</sup>                    |
| pCMV-WHSC1               | pCMV-EGFP-WHSC1-mCherry           | Amp <sup>R</sup>                    |

|               |                                |                                     |
|---------------|--------------------------------|-------------------------------------|
| pCMV-SFTA2    | pCMV-EGFP-SFTA2-mCherry        | Amp <sup>R</sup>                    |
| pCMV-LEPROTL1 | pCMV-EGFP-LEPROTL1-mCherry     | Amp <sup>R</sup>                    |
| pVDR-TGA      | pCMV-3xFLAG-VDR-TGA-Δutr       | via Addgene 11680; Kan <sup>R</sup> |
| pVDR-TGA-utr  | pCMV-3xFLAG-VDR-TGA-utr(1-201) | Kan <sup>R</sup>                    |
| pVDR-TGG-utr  | pCMV-3xFLAG-VDR-TGG-utr(1-201) | Kan <sup>R</sup>                    |

---

§ p425-dualFP plasmid was constructed previously as described in ref. Anzalone, et al. *Nat. Methods* **2016**, *13*, 453; contains NheI and AatII restriction sites for cloning new RT inserts.

‡ pCMV-dualFP plasmids contain NheI and BamHI restriction sites for cloning new RT inserts.

**Table S4.** Sequences of synthetic RT constructs.

| <b>Construct</b>   | <b>Sequence</b>                                                                                                                                                                   |
|--------------------|-----------------------------------------------------------------------------------------------------------------------------------------------------------------------------------|
| GFP-mCherry fusion | GGCAGCGGCGACTACAAGGACGACGACGACAAGTATGACTGCTCGAAGAAAAGATACG<br>AAGGAGGCGGCCTGGCCGGAGCACTACCGCATCGACGCGTATTCTGAATACTGGCAGCGG<br>CATCATCACCATCACCACGGCGGTTCTATGGGAATGTCTGGA          |
| RT-1               | GGCAGCGGCGACTACAAGGACGACGACGACAAGTAGGACTGCTCGAAGAAAAGATAC<br>GAAGGAGGCGGCCTGGCCGGAGCACTACCGCATCGACGCGTATTCTGAATACTGGCAGCGG<br>CCATCATCACCATCACCACGGCGGTTCTATGGGAATGTCTGGA         |
| RT-2               | GGCAGCGGCGACTACAAGGACGACGACGACAAGTAGCAATTAGCTCGAAGAAAAGATAC<br>GAAGGAGGCGGCCTGGCCGGAGCACTACCGCATCGACGCGTATTCTGAATACTGGCAGCGG<br>CCATCATCACCATCACCACGGCGGTTCTATGGGAATGTCTGGA       |
| RT-3               | GGCAGCGGCGACTACAAGGACGACGACGACAAGTAGCAATTACAGCGAAGAAAAGATAC<br>GAAGGAGGCGGCCTGGCCGGAGCACTACCGCATCGACGCGTATTCTGAATACTGGCAGCGG<br>CCATCATCACCATCACCACGGCGGTTCTATGGGAATGTCTGGA       |
| RT-4               | CGGCAGCGGCGACTACAAGGACGACGACGACAAGTAGCAATTAGGACGAAGAAAAGATA<br>CGAAGGAGGCGGCCTGGCCGGAGCACTACCGCATCGACGCGTATTCTGAATACTGGCAGCG<br>GCCATCATCACCATCACCACGGCGGTTCTATGGGAATGTCTGGA      |
| RT-5               | GGCAGCGGCGACTACAAGGACGACGACGACAAGTAGCAGTTAGCTCGAAGAAAAGATAC<br>GAAGGAGGCGGCCTGGCCGGAGCACTACCGCATCGACGCGTATTCTGAATACTGGCAGCGG<br>CCATCATCACCATCACCACGGCGGTTCTATGGGAATGTCTGGA       |
| RT-6               | GGCAGCGGCGACTACAAGGACGACGACGACAAGTAGCAACGAGCTCGAAGAAAAGATAC<br>GAAGGAGGCGGCCTGGCCGGAGCACTACCGCATCGACGCGTATTCTGAATACTGGCAGCGG<br>CCATCATCACCATCACCACGGCGGTTCTATGGGAATGTCTGGA       |
| RT-7               | GGCAGCGGCGACTACAAGGACGACGACGACAAGTAGCCACTAGCTCGAAGAAAAGATAC<br>GAAGGAGGCGGCCTGGCCGGAGCACTACCGCATCGACGCGTATTCTGAATACTGGCAGCGG<br>CCATCATCACCATCACCACGGCGGTTCTATGGGAATGTCTGGAGACGTC |
| RT-8               | GGCAGCGGCGACTACAAGGACGACGACGACAAGTAGCGCCAGGCTCGAAGAAAAGATAC<br>GAAGGAGGCGGCCTGGCCGGAGCACTACCGCATCGACGCGTATTCTGAATACTGGCAGCGG<br>CCATCATCACCATCACCACGGCGGTTCTATGGGAATGTCTGGA       |
| RT-9               | GGCAGCGGCGACTACAAGGACGACGACGACAAGTAGCTAGGCGCTCGAAGAAAAGATAC<br>GAAGGAGGCGGCCTGGCCGGAGCACTACCGCATCGACGCGTATTCTGAATACTGGCAGCGG<br>CCATCATCACCATCACCACGGCGGTTCTATGGGAATGTCTGGA       |
| RT-10              | GCTAGCGGCAGCGGCGACTACAAGGACGACGACGACAAGTAGCTATCCGCTCGAAGAAA<br>GATACGAAGGAGGCGGCCTGGCCGGAGCACTACCGCATCGACGCGTATTCTGAATACTGGC<br>AGCGGCCATCATCACCATCACCACGGCGGTTCTATGGGAATGTCTGGA  |
| RT-11              | GGCAGCGGCGACTACAAGGACGACGACGACAAGTAGCAGACTCCCGGAAGAAAAGATAC<br>GAAGGAGGCGGCCTGGCCGGAGCACTACCGCATCGACGCGTATTCTGAATACTGGCAGCGG<br>CCATCATCACCATCACCACGGCGGTTCTATGGGAATGTCTGGA       |
| RT-12              | GGCAGCGGCGACTACAAGGACGACGACGACAAGTAGCAAACCTCCCGGAAGAAAAGATAC<br>GAAGGAGGCGGCCTGGCCGGAGCACTACCGCATCGACGCGTATTCTGAATACTGGCAGCGG<br>CCATCATCACCATCACCACGGCGGTTCTATGGGAATGTCTGGA      |
| RT-13              | GGCAGCGGCGACTACAAGGACGACGACGACAAGTAGCAGCATCCCGGAAGAAAAGATAC<br>GAAGGAGGCGGCCTGGCCGGAGCACTACCGCATCGACGCGTATTCTGAATACTGGCAGCGG<br>CCATCATCACCATCACCACGGCGGTTCTATGGGAATGTCTGGA       |
| RT-14              | GGCAGCGGCGACTACAAGGACGACGACGACAAGTAGCAGACTGCTCGAAGAAAAGATAC<br>GAAGGAGGCGGCCTGGCCGGAGCACTACCGCATCGACGCGTATTCTGAATACTGGCAGCGG<br>CCATCATCACCATCACCACGGCGGTTCTATGGGAATGTCTGGA       |
| RT-15              | GGCAGCGGCGACTACAAGGACGACGACGACAAGTAGCAATTAGCTCCAGACAAGATACG                                                                                                                       |

|       |                                                                                                                                                                                         |
|-------|-----------------------------------------------------------------------------------------------------------------------------------------------------------------------------------------|
|       | AAGGAGGCGGCCTGGCCGGAGCACTACCGCATCGACGCGTATTTCGAATACTGGCAGCGGC<br>CATCATCACCATCACCACGGCGGTTCTATGGGAATGTCTGGATCTGGC                                                                       |
| RT-16 | GGCAGCGGCGACTACAAGGACGACGACGACAAGTAGCAATTAGCTGACATTTCCGATACG<br>AAGGAGGCGGCCTGGCCGGAGCACTACCGCATCGACGCGTATTTCGAATACTGGCAGCGGC<br>CATCATCACCATCACCACGGCGGTTCTATGGGAATGTCTGGATCTGGC       |
| RT-17 | GGCAGCGGCGACTACAAGGACGACGACGACAAGTAGCAATTAGCTCATCCAGAAAGATACG<br>AAGGAGGCGGCCTGGCCGGAGCACTACCGCATCGACGCGTATTTCGAATACTGGCAGCGGC<br>CATCATCACCATCACCACGGCGGTTCTATGGGAATGTCTGGATCTGGC      |
| RT-18 | GGCAGCGGCGACTACAAGGACGACGACGACAAGTAGCAATTAGCTCATCCAGACGATACG<br>AAGGAGGCGGCCTGGCCGGAGCACTACCGCATCGACGCGTATTTCGAATACTGGCAGCGGC<br>CATCATCACCATCACCACGGCGGTTCTATGGGAATGTCTGGATCTGGC       |
| RT-19 | GGCAGCGGCGACTACAAGGACGACGACGACAAGTAGCAATTAGCTCATCCAGACATTACG<br>AAGGAGGCGGCCTGGCCGGAGCACTACCGCATCGACGCGTATTTCGAATACTGGCAGCGGC<br>CATCATCACCATCACCACGGCGGTTCTATGGGAATGTCTGGATCTGGC       |
| RT-20 | GGCAGCGGCGACTACAAGGACGACGACGACAAGTAGCAATTAGCTCATCCAGACATTCCG<br>AAGGAGGCGGCCTGGCCGGAGCACTACCGCATCGACGCGTATTTCGAATACTGGCAGCGGC<br>CATCATCACCATCACCACGGCGGTTCTATGGGAATGTCTGGATCTGGC       |
| RT-21 | GGCAGCGGCGACTACAAGGACGACGACGACAAGTAGCAATTAGCTCATCCAGACATTCCC<br><u>ATAGAGGCGGCCTGGCCGGAGCACTACCGCATCGACGCGTATTTCGAATACTGGCAGCGGC</u><br>ATCATCACCATCACCACGGCGGTTCTATGGGAATGTCTGGATCTGGC |
| RT-22 | GGCAGCGGCGACTACAAGGACGACGACGACAAGTAGCAATTAGCTCATCCAGACATTCCC<br><u>ATAGAGGCGGCCTGGCCGGAGCACTACCGCATCGACGCGTATTTCGAATACTGGCAGCGGC</u><br>ATCATCACCATCACCACGGCGGTTCTATGGGAATGTCTGGATCTGGC |
| RT-23 | GGCAGCGGCGACTACAAGGACGACGACGACAAGTAGGACACTGCTCATCCAGACATTCCC<br><u>ATAGAGGCGGCCTGGCCGGAGCACTACCGCATCGACGCGTATTTCGAATACTGGCAGCGGC</u><br>ATCATCACCATCACCACGGCGGTTCTATGGGAATGTCTGGATCTGGC |
| RT-24 | GGCAGCGGCGACTACAAGGACGACGACGACAAGTAGCGCCAGGCTCATCCAGACATTCCC<br><u>ATAGAGGCGGCCTGGCCGGAGCACTACCGCATCGACGCGTATTTCGAATACTGGCAGCGGC</u><br>ATCATCACCATCACCACGGCGGTTCTATGGGAATGTCTGGATCTGGC |
| RT-25 | GGCAGCGGCGACTACAAGGACGACGACGACAAGTAGCTAGGCGCTCATCCAGACATTCCC<br><u>ATAGAGGCGGCCTGGCCGGAGCACTACCGCATCGACGCGTATTTCGAATACTGGCAGCGGC</u><br>ATCATCACCATCACCACGGCGGTTCTATGGGAATGTCTGGATCTGGC |

---

For yeast or mammalian vector constructs, sequences were cloned between EGFP and mCherry open reading frames; bold: stop codon; single underline: primary sequence RT motif; double underline: stem forming sequence. For constructs containing UAA or UGA stop codons, only the stop codon portion of the construct was altered.

**Table S5.** Sequences of human 3'-UTR constructs.

| <b>Construct</b> | <b>Sequence</b>                                                                                                                                                                                                                                                                                                                  |
|------------------|----------------------------------------------------------------------------------------------------------------------------------------------------------------------------------------------------------------------------------------------------------------------------------------------------------------------------------|
| VDR              | ctcggcatggacgagctgtacaaagcta gcggcagcggcGGCAATGAGATCTCC <b>TG</b> ACTAGGACAGCCTGTGGC<br>GGTGCCTGGGTGGGGCTGCTCCTCCAGGGCCACGTGCCAGGCCCGGGCTGGCGGCTACT<br>CAGCAGCCCTCTCACCCCGTCTGGGGTTCAGCCCTCTCTGCCACCTCCCCATCCcaccgg<br>cggttctatgggaatgtctgggatccaccggcggccaccatggtgagcaagg                                                      |
| ACP2             | ctcggcatggacgagctgtacaaagcta gcggcagcggcgactacaaggacgacgacgacaagCACGCCT <b>TG</b> ACAACCACTCA<br>GCCCCCTTCCCTCCACCTCCAAGGGGAGGTGGGCTGGGCCCTCGCTCCTGACTGTTGCTGC<br>TCCCggcagcggccatcatcaccatcaccacggcggttctatgggaatgtctgggatccaccggcggccaccatggtgagcaagg                                                                          |
| trACP2           | ctcggcatggacgagctgtacaaagcta gcggcagcggcgactacaaggacgacgacgacaagCACGCC <b>TG</b> ACAACCACTCA<br>GCCCCCTTCCCTCCACCTCCcaccggcggttctatgggaatgtctgggatccaccggcggccaccatggtgagcaagg                                                                                                                                                   |
| PVRL3            | ctcggcatggacgagctgtacaaagcta gcggcagcggcgactacaaggacgacgacgacaagAGGGAGTGGTATGTT <b>TAG</b> C<br>AACCACTGAATGTGACTTTACTATGTACAATGTTTCATTACACTAGTAGATCATTTTCAGA<br>TTGTTTCACTTTTCTTGAGGAAGAATAAGCTTTTTCAAGTTGATGCCAGCGGCCATCAT<br>CACCATCACcaccggcggttctatgggaatgtctgggatccaccggcggccaccatggtgagcaagg                              |
| CCNE1            | ctcggcatggacgagctgtacaaagcta gcggcagcggcGGGCCGAAATGGCG <b>TG</b> ACCACCCCATCCTTCTCC<br>ACCAAAGACAGTTGCGCGCCTGCTCCACGTTCTTCTGTCTGTTGCAGCGGAGGCGTGCG<br>TTGCTTTTACAGATATCTGTATGGAAGAGTGTTCCTCCACAACAGAAGTATTTCTcaccggc<br>ggttctatgggaatgtctgggatccaccggcggccaccatggtgagcaagg                                                      |
| RXFP2            | ctcggcatggacgagctgtacaaagcta gcggcagcggcgactacaaggacgacgacgacaagATGAAACCAGTTTCC <b>TAG</b> C<br>AATCATTTTGGATCACTGGACTTTCAGTGGACTACCTAAAACAGGGGACAGCTTTTGGGAAG<br>AGGCAGCGGCCATCATCACCATCACcaccggcggttctatgggaatgtctgggatccaccggcggccaccatggtgagca<br>agg                                                                        |
| SYT12            | ctcggcatggacgagctgtacaaagcta gcggcagcggcgactacaaggacgacgacgacaagGCTGTCCGGCGAAACT <b>TAG</b> C<br>AACCAGGGCGGGCCAGTTGGGCAATGGAGCTGCTGGAGCCCGGTACCCACTCAGCTCTGT<br>CTGATGCCCTTCCATAGCCCAGCTGGAGCCGTGTACTGGGGTCCCCTGGCAGAGTCTT<br>CATGACCCATCCTggcagcggccatcatcaccatcacaccggcggttctatgggaatgtctgggatccaccggcggccaccatggtg<br>gcaagg |
| ERVV2            | ctcggcatggacgagctgtacaaagcta gcggcagcggcGAGGAATTTTCTCT <b>TG</b> A GACAGAGCAAGAGAGG<br>GAGACCCTGATGACTTCTTCGCCCCATGTCAGCAGGAAGTAGTTACAGAAGACCCACGAC<br>GTCCTTACAACCAGAGCTTTTCAGGGTCTCCATCTCTTGAGGAGGGAAATATTAGGGTAcac<br>ggcggttctatgggaatgtctgggatccaccggcggccaccatggtgagcaagg                                                  |
| VGLL2            | ctcggcatggacgagctgtacaaagcta gcggcagcggcGCATCCCTCCTGAGCT <b>TG</b> ATCTGCTGACCCAGGGTT<br>TCCCCTTCCCCTTCCCTTCTGGCCAGCCTTGGAGGCTCAGCATCTGTGCCTCTCACTCCGTG<br>GATTAGGACATGGGGGAAGGCAGAGACTTCAGACTTCTCAGTGTGTTGGGAAAACCcaccggc<br>ggttctatgggaatgtctgggatccaccggcggccaccatggtgagcaagg                                                |
| PTDSS2           | ctcggcatggacgagctgtacaaagcta gcggcagcggcGCACCAACTCCAAACT <b>TG</b> ACCTGGGCCGTGGCTGCC<br>TCGTGAGCCTCCAGAGCCCAGGCCTCCGTGGCCTCCTCCTGTGTGAGTCCCACCAGGAGC<br>CACGTGCCCGGCCTTGCCCTCAAGTTTTTTGCTTTTCTCCTGTGCACCTGGCGAGGcaccggc<br>ggttctatgggaatgtctgggatccaccggcggccaccatggtgagcaagg                                                  |
| IL18             | ctcggcatggacgagctgtacaaagcta gcggcagcggcGTTCAAACGAAGACT <b>TAG</b> CTATTAATAATTCATGC<br>CGGGCGCAGTGGCTCACGCTGTTATCCAGCCCTTGGGAGGCTGAGGCGGGCAGATCA<br>CCAGAGGTCAGGTGTTCAAGACCAGCCTGACCAACATGGTGAAACCTCATCTCTACTAcac<br>gcggttctatgggaatgtctgggatccaccggcggccaccatggtgagcaagg                                                      |
| PCSK9            | ctcggcatggacgagctgtacaaagcta gcggcagcggcTCCAGGAGCTCCAG <b>TG</b> ACAGCCCCATCCCAGGAT<br>GGGTGTCTGGGGAGGGTCAAGGGCTGGGGCTGAGCTTAAAAATGGTTCCGACTTGTCCCT<br>CTCTCAGCCCTCCATGGCCTGGCACGAGGGGATGGGGATGCTTCCGCCTTTCCGGGGCcac<br>gcggttctatgggaatgtctgggatccaccggcggccaccatggtgagcaagg                                                    |
| EDN1             | ctcggcatggacgagctgtacaaagcta gcggcagcggcgactacaaggacgacgacgacaagCGAGCACATTGG <b>TG</b> ACAGA<br>CCTTCGGGGCCTGTCTGAAGCCA ggcagcggccatcatcaccatcaccacggcggttctatgggaatgtctgggatccacc                                                                                                                                               |



|          |                                                                                                                                                                                                                                                                                                                                   |
|----------|-----------------------------------------------------------------------------------------------------------------------------------------------------------------------------------------------------------------------------------------------------------------------------------------------------------------------------------|
|          | gtcgccaccatggtgagcaagg                                                                                                                                                                                                                                                                                                            |
| CDKN2B   | ctcggcatggacgagctgtacaaagctagcggcagcggcgactacaaggacgacgacgacaagACAGCCACGGGGGACT <b>TGAC</b><br>GCCAGGTTCCCCAGCCGCCACAACGACTTTATTTTCTTACCCAATTTCCCACCCCCACCC<br>ACCTAATTCGATGAAGGCTGCCAACGGGGAGCGGCGGAAAGCCTGTAAGCCTGCAAGCCT<br>GTCTGAGACTCACggcagcggccatcatcaccatcaccacggcggttctatgggaatgtctgggatccaccggtcgccaccatggtga<br>gcaagg |
| KCNF1    | tgctgctggtattaccatggtatggatgaattgtacaaagctagcggcagcggcCTCCAGAGTTGCAAG <b>TGAC</b> CAGGAGGG<br>CCCCTCAGGCAGAGATGGACCAGGCGGTGGACAGATGGGTAGATGTGGCAGGCATGTTCAT<br>CGACAGCACAGAAGGGCTGTCCTGTGTCCCCCAACCCTCCCCTGGACAGACTCTGAAGG<br>CCCTCCCcaccggcggttctatgggaatgtctggatctggcagcgtcatggttcaaaaggtgaagaagataatg                          |
| MYNN     | tgctgctggtattaccatggtatggatgaattgtacaaagctagcggcagcggcTTACAACAATTATACT <b>TGAC</b> TTTGTAA<br>GAATATGGAATTGCTAAGATATCATTGGTAGCAAACATCTCTGGTAAGGTGCATATATTCA<br>TATTAAATTCCCATTCAATTTGAGTTGcaccggcggttctatgggaatgtctggatctggcagcgtcatggttcaaaaggtgaa<br>gaagataatg                                                                 |
| NKX2-4   | tgctgctggtattaccatggtatggatgaattgtacaaagctagcggcagcggcTATGGCAGGACGTGG <b>TGAC</b> CAGCGAGG<br>GCGCCCCGGGGCTAGGTCCTGGTGCACCCGAAGGGTCTGCAAGAACTGCTAGAACGGAT<br>GGGGGAGGCATGCGAAAACCGACTCGCGCGTGTAACTGCGATTCAAACGAACCGGTCT<br>CAGAGAGcaccggcggttctatgggaatgtctggatctggcagcgtcatggttcaaaaggtgaagaagataatg                             |
| KIF3C    | tgctgctggtattaccatggtatggatgaattgtacaaagctagcggcagcggcGTGGCGGACCATGAG <b>TGAC</b> CAACCATC<br>ACGTCAGGCTGCCATCCAATAGACTCCTGGGATGGGGCAGCCAACCCTGGTTCATCTCAT<br>CTGCCGCTTGGTGCCTGTGCGTGTGCGTGCATGTGCGTGTGCGTGTGTGCAGGGGTGAGAA<br>TCTGGcaccggcggttctatgggaatgtctggatctggcagcgtcatggttcaaaaggtgaagaagataatg                           |
| PRR20A   | tgctgctggtattaccatggtatggatgaattgtacaaagctagcggcagcggcACCGACATTGCGTAT <b>TGAC</b> CCACTATCT<br>GCCACCCACGTTGTTCCCAGCCTCCCTTCCACCTGGACGTCCCCCAGCCCCACTTC<br>TGCTCCACTCCTCCCCGACTGGACCTGAAGCCTGAGCTTCCCCTGAACCTGGAGTACGCA<br>ACTcaccggcggttctatgggaatgtctggatctggcagcgtcatggttcaaaaggtgaagaagataatg                                 |
| FGD5     | tgctgctggtattaccatggtatggatgaattgtacaaagctagcggcagcggcGATGCGAGTGTGTTA <b>TAG</b> CAGTTATCA<br>AGCATGTGGACTTGTAACAAATCTTAGGTC AATATGTGAATGCTTTTAGAAGCcacggcggttc<br>tatgggaatgtctggatctggcagcgtcatggttcaaaaggtgaagaagataatg                                                                                                        |
| WHSC1    | tgctgctggtattaccatggtatggatgaattgtacaaagctagcggcagcggcGTCACAGAGGGCAAA <b>TAG</b> CGCCAGGC<br>GGCCGCTTGGCCGGATCCAGGGGCGGTGCAGGGCGGCCGCCCCTGCCTGCGGGAGAGGG<br>CGAGCATGAACTGGCCCCGAGGACCCAGCTCGAGCCGCCAGGACACAGACGTACAGGCC<br>TCCTCGGGAcacggcggttctatgggaatgtctggatctggcagcgtcatggttcaaaaggtgaagaagataatg                            |
| SFTA2    | tgctgctggtattaccatggtatggatgaattgtacaaagctagcggcagcggcGTTGTCTGCAACACAT <b>TGAC</b> CAGCCATTG<br>AAGCCTGTGTCCTTCTTGGCCCCGGGCTTTTGGGCCGGGGATGCAGGAGGCAGGCCCCGAC<br>CCTGTCTTTACAGAGGCCCCACCCTCCTGAGCGGCAATAAAcacggcggttctatgggaatgtctggatctg<br>gcagcgtcatggttcaaaaggtgaagaagataatg                                                  |
| LEPROTL1 | tgctgctggtattaccatggtatggatgaattgtacaaagctagcggcagcggcCCCTCTCAGGCACAAT <b>TGAC</b> CAACTACTG<br>CTCAGTGCCAGACACTGCACCATGcaccggcggttctatgggaatgtctggatctggcagcgtcatggttcaaaaggtgaaga<br>agataatg                                                                                                                                   |
| AQP4     | ctcggcatggacgagctgtacaaagctagcggcagcggcGAGGTATTGTCTTCAGTAT <b>TGAC</b> TAGAAAGATCGCAC<br>TGAAAGCAGACAAGACTCCTTAGAACTGTCCTCAGATTTCTTCCACCCATTAAGGAAACA<br>GATTTGTTAcacggcggttctatgggaatgtctgggatccaccggtcgccaccatggtgacgaagg                                                                                                       |
| MAPK10   | ctcggcatggacgagctgtacaaagctagcggcagcggcCTGGGTTGTTGCAGG <b>TGAC</b> ACTAGCCGCCTGCCTGCG<br>AAACCCAGCGTTCTTACAGGAGAcacggcggttctatgggaatgtctgggatccaccggtcgccaccatggtgacgaagg                                                                                                                                                         |
| OPRL1    | ctcggcatggacgagctgtacaaagctagcggcagcggcGAGACGGTACCGCGGCCCGCA <b>TGAC</b> TAGGCGTGG<br>ACCTGCCCATGGTGCCTGTACGCCCGCAGAGCCCATCTACGCCAACACAGAGCTCACAC<br>AGGTCCTGCTCTCcacggcggttctatgggaatgtctgggatccaccggtcgccaccatggtgacgaagg                                                                                                       |

Lower case: linker and flanking homology; upper case: derived from gene; bold underlined: stop codon

**Table S6.** Dual-FP reporter sequences.

| Construct         | Sequence                                                                                                                                                                                                                                                                                                                                                                                                                                                                                                                                                                                                                                                                                                                                                                                                                                                                                                                                                                                                                                                                                                                                                                                                                                                                                                                                                                                                                                                                                                                                                                                                                                                     |
|-------------------|--------------------------------------------------------------------------------------------------------------------------------------------------------------------------------------------------------------------------------------------------------------------------------------------------------------------------------------------------------------------------------------------------------------------------------------------------------------------------------------------------------------------------------------------------------------------------------------------------------------------------------------------------------------------------------------------------------------------------------------------------------------------------------------------------------------------------------------------------------------------------------------------------------------------------------------------------------------------------------------------------------------------------------------------------------------------------------------------------------------------------------------------------------------------------------------------------------------------------------------------------------------------------------------------------------------------------------------------------------------------------------------------------------------------------------------------------------------------------------------------------------------------------------------------------------------------------------------------------------------------------------------------------------------|
| Yeast dual-FP     | <p>ATGTCTAAAGGTGAAGAATTATTCCTGGTGTGTCCTCAATTTGGTTGAATTAGATGGTG<br/> ATGTTAATGGTCACAAATTTCTGTCTCCGGTGAAGGTGAAGGTGATGCTACTTACGGTAA<br/> ATTGACCTTAAAATTTATTTGTACTACTGGTAAATGGCAGTTCATGGCCAACCTTAGTC<br/> ACTACTTTTCGGTTATGGTGTTCATGTTTTGCTAGATACCCAGATCATATGAAACAACATG<br/> ACTTTTTCAAGTCTGCCATGCCAGAAGGTTATGTTCAAGAAAGAACTATTTTTTTCAAAGA<br/> TGACGGTAACACTACAAGACCAGAGCTGAAGTCAAGTTTGAAGGTGATACCTTAGTTAATAG<br/> AATCGAATTAAGGTATTGATTTTAAAGAAGATGGTAAACATTTTAGGTCACAAATTGGA<br/> ATACAACATAACTCTACAATGTTTACATCATGGCTGACAAACAAAAGAATGGTATCAA<br/> AGTTAACTTCAAATTAGACACAACATTGAAGATGGTCTGTTCAATTAGCTGACCATTAT<br/> CAACAAAATACTCCAATTGGTGATGGTCCAGTCTTGTACCAGACAACCATTACTTATCCA<br/> CTCAATCTGCCTTATCCAAAGATCCAAACGAAAAGAGAGACCACATGGTCTTGTAGAAT<br/> TTGTTACTGCTGCTGGTATTACCCATGGTATGGATGAATTGTACAAA<i>GCTAGC</i>****<i>GACGTC</i><br/> ATGGTTTTCAAAGGTGAAGAAGATAATATGGCTATTATTAAGAATTTATGAGATTTAAA<br/> GTTTCATATGGAAGGTCAGTTAATGGTCATGAATTTGAAATTGAAGGTGAAGGTGAAGGT<br/> AGACCATATGAAGGTACTCAAACCTGCTAAATTGAAAGTTACTAAAGGTGGTCCATTACCA<br/> TTTGCTTGGGATATTTTGTCCACCACAATTTATGTATGGTTCAAAGCTTATGTTAAACATCC<br/> AGCTGATATTCAGATTATTTAAAATTTGTCAATTTCCAGAAGGTTTTAAATGGGAAAGAGTT<br/> ATGAATTTTGAAGATGGTGGTGTGTTACTGTTACTCAAGATTCATCATTACAAGATGGTG<br/> AATTTATTTATAAAGTTAAATTGAGAGGTAATAATTTCCATCAGATGGTCCAGTTATGCA<br/> AAAAAAACTATGGGTTGGGAAGCTTCATCAGAAAGAATGTATCCAGAAGATGGTGCTTT<br/> AAAAGGTGAAATTAACAAAGATTGAAATTAAGATGGTGGTCATTATGATGCTGAAGT<br/> TAAACTACTTATAAAGCTAAAAAACCAGTTCAATTACCAGGTGCTTATAATGTTAATATT<br/> AAATTGGATATTACTTCACATAATGAAGATTACTATTGTTGAACAATATGAAAGAGCTG<br/> AAGGTAGACATTCAACTGGTGGTATGGATGAATTATATTA</p>                   |
| Mammalian dual-FP | <p>ATGGTGAGCAAGGGCGAGGAGCTGTTACCGGGGTGGTGCCCATCCTGGTTCGAGCTGGAC<br/> GGCGACGTAAACGGCCACAAGTTACAGCGTGTCCGGCGAGGGCGAGGGCGATGCCACCTAC<br/> GGCAAGCTGACCCTGAAGTTCATCTGCACCACCGGCAAGCTGCCCGTGCCTGGCCACC<br/> CTCGTGACCACCCTGACCTACGGCGTGCAGTGCTTCAGCCGCTACCCCGACCACATGAAGC<br/> AGCACGACTTCTTCAAGTCCGCCATGCCCGAAGGCTACGTCCAGGAGCGCACCATCTTCTT<br/> CAAGGACGACGGCAACTACAAGACCCGCGCCGAGGTGAAGTTCGAGGGCGACACCCTGG<br/> TGAACCGCATCGAGCTGAAGGGCATCGACTTCAAGGAGGACGGCAACATCCTGGGGCACA<br/> AGCTGGAGTACAACATAACAGCCACAACGTCTATATCATGGCCGACAAGCAGAAGAAGC<br/> GCATCAAGGTGAATTC AAGATCCGCCACAACATCGAGGACGGCAGCGTGCAGCTCGCCG<br/> ACCACTACCAGCAGAACACCCCATCGGCGACGGCCCGTGTCTGCTGCCGACAACCACT<br/> ACCTGAGCACCCAGTCCGCCCTGAGCAAAGACCCCAACGAGAAGCGCGATCACATGGTCC<br/> TGCTGGAGTTCTGTGACCGCCGCCGGGATCACTCTCGGCATGGACGAGCTGTACAAGTACA<br/> <i>AAGCTAGC</i>****<i>GGATCC</i>ATGGTGAAGGCGAGGAGGATAACATGGCCATCATCAAGG<br/> AGTTCATGCGTTCAAGGTGCACATGGAGGGCTCCGTGAACGGCCACGAGTTCGAGATCG<br/> AGGGCGAGGGCGAGGGCCGCCCTACGAGGGCACCCAGACCGCCAAGCTGAAGGTGACC<br/> AAGGGTGGCCCCCTGCCCTTCGCTGGGACATCCTGTCCCTCAGTTCATGTACGGCTCCA<br/> AGGCTACGTGAAGCACCCGCGGACATCCCGACTACTTGAAGCTGTCTTCCCGGAGG<br/> GCTTCAAGTGGGAGCGCGTGATGAATTCGAGGACGGCGGCGTGGTGACCCTGACCCAGG<br/> ACTCCTCCCTGCAGGACGGCGAGTTCATCTACAAGGTGAAGCTGCGCGGCACCAACTTCC<br/> CCTCCGACGGCCCCGTAATGCAGAAGAAGACCATGGGCTGGGAGGCTCCTCCGAGCGGA<br/> TGTACCCCGAGGACGGCGCCCTGAAGGGCGAGATCAAGCAGAGGCTGAAGCTGAAGGAC<br/> GGCGGCGACTACGACGCTGAGGTCAAGACCACCTACAAGGCAAGAAGCCCGTGCAGCTG<br/> CCCGGCGCCTACAACGTCAACATCAAGTTGGACATCACCTCCACAACGAGGACTACACC<br/> ATCGTGAACAGTACGAACGCGCCGAGGGCCGCGCCACTCCACCGCGGCATGGACGAGCTG<br/> TACAAGTAA</p> |

italic: restriction sites; \*\*\*\*: RT insert; bold: stop codon, GFP encoded upstream of \*\*\*\*, mCherry encoded downstream.
